# Supplementary material for: miR-140-3p Inhibits Cutaneous Melanoma Progression by Disrupting AKT/p70S6K and JNK Pathways through ABHD2
Source: PubMed Central journal article supplement — Mol Ther Oncolytics. 2020 Mar 30;17:83–93. doi: 10.1016/j.omto.2020.03.009 (PMC7163049; doi:10.1016/j.omto.2020.03.009), 2020-03-30
Supplement: mmc1.pdf [file mmc1.pdf]

**OMTO, Volume 17**

**Supplemental Information**

**miR-140-3p Inhibits Cutaneous Melanoma  
Progression by Disrupting AKT/p70S6K  
and JNK Pathways through ABHD2**

**Yuanmin He, Yan Yang, Yongmei Liao, Jixiang Xu, Li Liu, Changqiang Li, and Xia Xiong**

**Table S1. Univariate and multivariate analysis of clinical Variables and miR-140-3p expression levels in association with CM overall survival**

| Variables             | Category    | Frequency | Univariate analysis |        | multivariate analysis |        |
|-----------------------|-------------|-----------|---------------------|--------|-----------------------|--------|
|                       |             |           | HR (95% CI)         | P      | HR (95% CI)           | P      |
| Age                   | ≤50/>50     | 43/61     | 1.13 (1.02-1.24)    | 0.032  | 1.14 (1.03-1.27)      | 0.012  |
| Sex                   | Female/Male | 48/56     | 1.74 (1.36-2.83)    | 0.169  | 1.19 (1.07-2.23)      | 0.105  |
| AJCC stage            | I, II /ⅢⅣ   | 71/33     | 5.27 (2.97-6.97)    | <0.001 | 7.87 (6.87-10.74)     | <0.001 |
| Tumor thickness       | ≤1/>1       | 64/40     | 1.28 (1.17-1.34)    | <0.001 | 1.33 (1.21-1.53)      | <0.001 |
| Ulceration            | No/Yes      | 81/23     | 2.39 (1.68-3.96)    | <0.001 | 3.72 (2.32-6.78)      | <0.001 |
| miR-140-3p expression | ≤0.37/>0.37 | 52/52     | 0.84 (0.41-0.95)    | 0.042  | 0.80 (0.39-0.92)      | 0.022  |

Abbreviations: CM, cutaneous melanoma; HR, hazards ratio; CI, confidence interval.

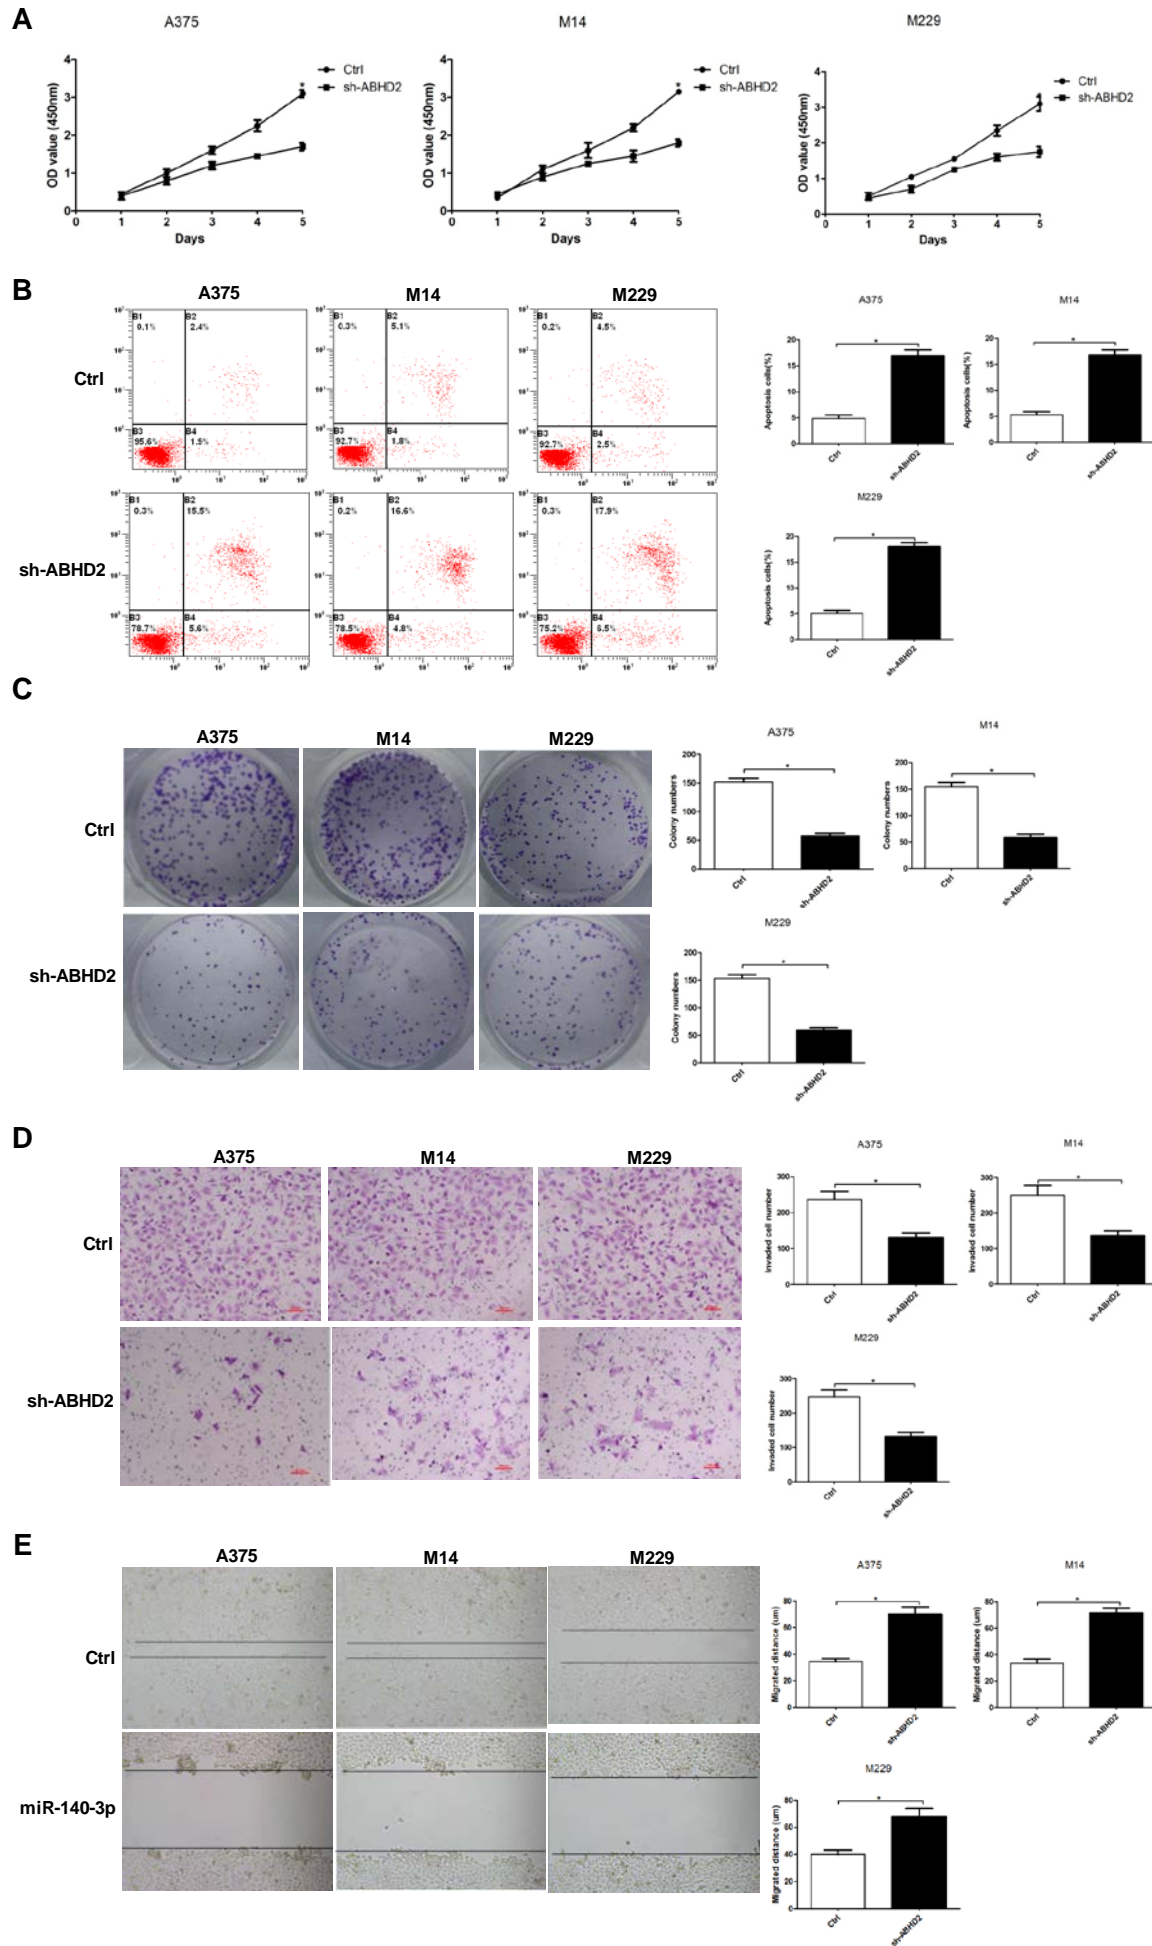

**Figure S1. sh-ABHD2 inhibits cell proliferation, invasion and clonogenic ability, as well as induces cell apoptosis in CM cells.** (A) Cell viability in A375, M14 and M229 cells were detected by CCK-8 assay. (B) Cell apoptosis in each group was detected by flow cytometry. (C) Clonogenic ability in each group was detected by clonogenic assay. (D) Cell invasion in each group was detected by transwell. (E) Migration ability in each group was detected by wound healing. (\*P < 0.05)
